# Supplementary material
Source: publisher site journal article supplement (https://www.dovepress.com/article/594281)
Supplement: Supplementary file 1 [file 594281%20Revised%20Supplementary%20Methods%201.docx]

**Supplementary Methods 1**: The 66 genes panel in Next-Generation Sequencing

DNA was extracted from peripheral blood or bone marrow samples. Targeted NGS was performed using a custom 66-gene panel with a standard Qiagen kit (QIAGEN Group, Venlo, The Netherlands). The assay has an estimated sensitivity of 60–80% and a specificity exceeding 99% for KIT D816V detection. The panel covered 66 genes associated with hematologic malignancies, including *ABL1, ANKRD26, ASXL1, BCOR, BCORL1, BRAF, CALR, CBL, CEBPA, CSF3R, DDX41, DNMT3A, ERCC6L2, ETNK1, ETV6, EZH2, FLT3, GATA2, GNB1, HRAS, IDH1, IKZF1, JAK2, KIT, KMT2A, KRAS, MBD4, MECOM, MPL, MYD88, NF1, NPM1, NRAS, PAX5, PHF6, PPM1D, PRF1, PRPF8, PTPN11, RAD21, RB1, RIT1, RRAS, RUNX1, SAMD9, SAMD9L, SETBP1, SF3B1, SF3B2, SH2B3, SMC1A, SMC3, SRP72, SRSF2, STAG2, STX11, STXBP2, TET2, TP53, U2AF1, UBA1, UNC13D, WT1, XPC,* and *ZRSR2.*
